# Supplementary material for: Development and Utility of Practical Indicators of Critical Outcomes in Dengue Patients Presenting to Hospital: A Retrospective Cross-Sectional Study
Source: MDPI journal article supplement (doi:10.3390/tropicalmed8040188), 2023-03-25
Supplement: s1 [file s1]

**Table S1.** Demographic characteristics of dengue patients in a teaching hospital during the 2015 dengue outbreak in Tainan, Taiwan.

| Characteristic                | ED<br>(n=3490)  | OPD<br>(n=739)    | p value              |
|-------------------------------|-----------------|-------------------|----------------------|
| Age (years)                   |                 |                   |                      |
| Mean (SD)                     | 49.7 (22)       | 43.3 (19.4)       | <0.0001 <sup>a</sup> |
| Median (Q1, Q3)               | 53 (30, 68)     | 42 (26, 60)       |                      |
| Temperature (°C)              |                 |                   |                      |
| Mean (SD)                     | 38.3 (1)        | 37.9 (1)          | <0.0001 <sup>a</sup> |
| Median (Q1, Q3)               | 38.5 (37.7, 39) | 37.8 (37.2, 38.7) |                      |
| Respiration rate (/min)       |                 |                   |                      |
| Mean (SD)                     | 19.7 (3)        | 19.8 (3.6)        | 0.0703 <sup>a</sup>  |
| Median (Q1, Q3)               | 20 (18, 20)     | 19 (18, 20)       |                      |
| Pulse (/min)                  |                 |                   |                      |
| Mean (SD)                     | 99.9 (19.2)     | 90.1 (22.6)       | <0.0001 <sup>a</sup> |
| Median (Q1, Q3)               | 100 (86, 113)   | 88.5 (78, 100)    |                      |
| DBP (mmHg)                    |                 |                   |                      |
| Mean (SD)                     | 81.9 (15.5)     | 72.7 (13.4)       | <0.0001 <sup>a</sup> |
| Median (Q1, Q3)               | 81 (72, 90)     | 72 (64, 80)       |                      |
| ALT (IU/L)                    |                 |                   |                      |
| Mean (SD)                     | 39.5 (135)      | 54 (155.7)        | <0.0001 <sup>a</sup> |
| Median (Q1, Q3)               | 19 (10, 39)     | 24 (12, 49)       |                      |
| AST (IU/L)                    |                 |                   |                      |
| Mean (SD)                     | 91.7 (400.2)    | 89.8 (271.3)      | 0.7901 <sup>a</sup>  |
| Median (Q1, Q3)               | 43 (31, 71)     | 44 (32, 70)       |                      |
| Platelet count (103/ $\mu$ L) |                 |                   |                      |
| Mean (SD)                     | 148.8 (64.8)    | 144.2 (65.0)      | 0.0482 <sup>a</sup>  |
| Median (Q1, Q3)               | 148 (108, 189)  | 144 (102, 186)    |                      |
| aPTT (sec)                    |                 |                   |                      |
| Mean (SD)                     | 39.4 (8.6)      | 39.9 (8.2)        | 0.0311 <sup>a</sup>  |
| Median (Q1, Q3)               | 38 (34.9, 41.9) | 39 (35.8, 41.9)   |                      |
| Advanced age, N (%)           |                 |                   |                      |
| ≥65 years                     | 1051 (30.1)     | 120 (16.2)        | <0.0001 <sup>b</sup> |
| <65 years                     | 2439 (69.9)     | 619 (83.8)        |                      |
| Sex, N (%)                    |                 |                   |                      |
| Male                          | 1753 (50.2)     | 398 (53.9)        | 0.0732 <sup>b</sup>  |
| Female                        | 1737 (49.8)     | 341 (46.1)        |                      |
| Comorbidities, N (%)          |                 |                   |                      |
| DM                            | 405 (11.6)      | 45 (6.1)          | <0.0001 <sup>b</sup> |
| CKD/ESRD                      | 163 (4.7)       | 22 (3)            | 0.0409 <sup>b</sup>  |
| Liver cirrhosis               | 23 (0.7)        | 2 (0.3)           | 0.2392 <sup>c</sup>  |

|                    |             |            |                      |
|--------------------|-------------|------------|----------------------|
| Neoplasm           | 207 (5.9)   | 37 (5)     | <0.0001 <sup>c</sup> |
| COPD               | 79 (2.4)    | 0 (0)      | <0.0001 <sup>c</sup> |
| WHO classification |             |            | <0.0001 <sup>b</sup> |
| Group A            | 814 (23.3)  | 582 (78.8) |                      |
| Group B            | 2676 (76.7) | 157 (21.2) |                      |

Q1: 25 percentile, Q3: 75 percentile; a Wilcoxon rank sum test (Mann-Whitney U test); b Chi-square test; c Fisher's exact test; CKD: chronic kidney disease; COPD: chronic obstructive pulmonary disease; DM: diabetes mellitus; ED: emergency department; ESRD: end-stage renal disease; SD: standard deviation.

**Table S2.** Comparison of the demographic characteristics of included and excluded dengue patients in a teaching hospital during the 2015 dengue outbreak in Tainan, Taiwan

| Characteristic              | Included<br>(n=701) | Excluded<br>(n=3528) | p value              |
|-----------------------------|---------------------|----------------------|----------------------|
| Age (years)                 |                     |                      |                      |
| Mean (SD)                   | 61.5 (16.5)         | 46.0 (21.7)          | <0.0001 <sup>a</sup> |
| Median (Q1, Q3)             | 53 (52, 75)         | 46 (27, 64)          |                      |
| Length of illness<br>(days) |                     |                      |                      |
| Mean (SD)                   | 1 (1.2)             | 1 (1.1)              | 0.7475 <sup>a</sup>  |
| Median (Q1, Q3)             | 1 (0, 2)            | 1 (0, 2)             |                      |
| Temperature (°C)            |                     |                      |                      |
| Mean (SD)                   | 38.2 (1.0)          | 38.3 (1.0)           | 0.2971 <sup>a</sup>  |
| Median (Q1, Q3)             | 38.3 (37.5, 39)     | 38.4 (37.6, 39)      |                      |
| Respiration rate<br>(/min)  |                     |                      |                      |
| Mean (SD)                   | 19.7 (2.6)          | 19.7 (3.0)           | 0.8429 <sup>a</sup>  |
| Median (Q1, Q3)             | 20 (18, 20)         | 20 (18, 20)          |                      |
| Pulse (/min)                |                     |                      |                      |
| Mean (SD)                   | 95.7 (18.7)         | 99.7 (19.9)          | <0.0001 <sup>a</sup> |
| Median (Q1, Q3)             | 95 (83, 109)        | 100 (85, 113)        |                      |
| DBP (mmHg)                  |                     |                      |                      |
| Mean (SD)                   | 81.4 (15.6)         | 80.4 (15.5)          | 0.2096 <sup>a</sup>  |
| Median (Q1, Q3)             | 80 (71, 91)         | 80 (71, 89)          |                      |
| ALT (IU/L)                  |                     |                      |                      |
| Mean (SD)                   | 51.6 (258.2)        | 40.4 (102.2)         | 0.0003 <sup>a</sup>  |
| Median (Q1, Q3)             | 23 (13, 45)         | 19 (10, 39)          |                      |
| AST (IU/L)                  |                     |                      |                      |
| Mean (SD)                   | 124.4 (667.6)       | 89.6 (369.7)         | 0.0002 <sup>a</sup>  |

|                                         |                 |                   |                      |
|-----------------------------------------|-----------------|-------------------|----------------------|
| Median (Q1, Q3)                         | 49 (33, 86)     | 43 (31, 68)       |                      |
| Platelet count<br>(10 <sup>3</sup> /μL) |                 |                   |                      |
| Mean (SD)                               | 136.0 (65.6)    | 150.3 (64.5)      | <0.0001 <sup>a</sup> |
| Median (Q1, Q3)                         | 138.5 (91, 177) | 148.5 (111, 190)  |                      |
| aPTT (sec)                              |                 |                   |                      |
| Mean (SD)                               | 40.1 (11.6)     | 39.5 (7.7)        | 0.905 <sup>a</sup>   |
| Median (Q1, Q3)                         | 38.1 (34.7, 43) | 38.4 (35.2, 41.8) |                      |
| Advanced age, N<br>(%)                  |                 |                   |                      |
| ≥65 years                               | 315 (44.9)      | 856 (24.3)        | <0.0001 <sup>b</sup> |
| <65 years                               | 386 (55.1)      | 2672 (75.7)       |                      |
| Sex, N (%)                              |                 |                   |                      |
| Male                                    | 323 (46.1)      | 1828 (51.8)       | 0.0055 <sup>b</sup>  |
| Female                                  | 378 (53.9)      | 1700 (48.2)       |                      |
| Comorbidities, N<br>(%)                 |                 |                   |                      |
| DM                                      | 127 (18.1)      | 323 (9.2)         | <0.0001 <sup>b</sup> |
| CKD/ESRD                                | 56 (8.0)        | 129 (3.7)         | <0.0001 <sup>b</sup> |
| Liver cirrhosis                         | 11 (1.6)        | 14 (0.4)          | 0.0011 <sup>c</sup>  |
| Neoplasm                                | 66 (10.9)       | 178 (6.1)         | <0.0001 <sup>c</sup> |
| COPD                                    | 12 (1.7)        | 67 (1.9)          | 0.0738 <sup>c</sup>  |
| WHO classification                      |                 |                   | <0.0001 <sup>b</sup> |
| Group A                                 | 156 (22.2)      | 1246 (35.3)       |                      |
| Group B                                 | 545 (77.8)      | 2282 (64.7)       |                      |

Q1: 25 percentile, Q3: 75 percentile. <sup>a</sup> Wilcoxon rank sum test (Mann-Whitney U test). <sup>b</sup> Chi-square test. <sup>c</sup> Fisher's exact test. CKD: chronic kidney disease; COPD: chronic obstructive pulmonary disease; DM: diabetes mellitus; ED: emergency department; ESRD: end-stage renal disease; SD: standard deviation.
